# Supplementary material for: The Tonoplast-Localized Sucrose Transporter in Populus (PtaSUT4) Regulates Whole-Plant Water Relations, Responses to Water Stress, and Photosynthesis
Source: PLOS journal article supplement (doi:10.1371/journal.pone.0044467), 2012-08-31
Supplement: S2 (10.1371/journal.pone.0044467.s002) [file journal.pone.0044467.s002]

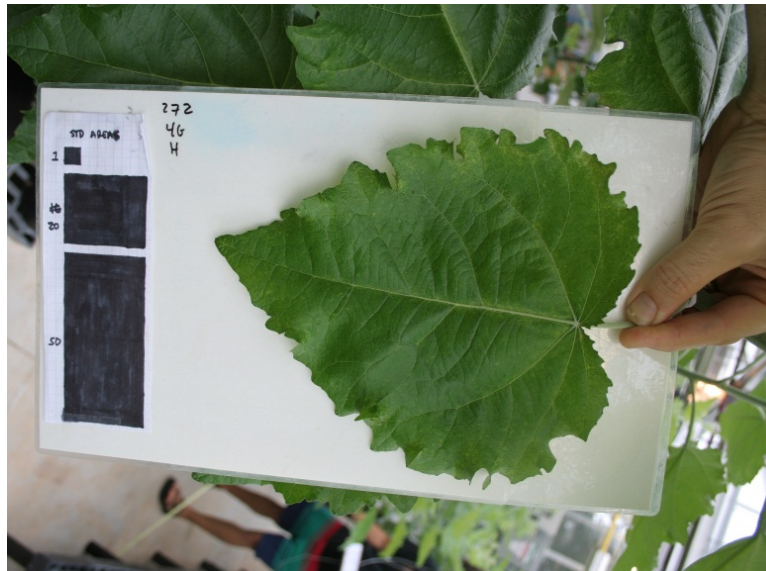

**Figure S2. Representative photograph used for calculating leaf area.** Leaf areas were determined by photographing leaves against a white background containing three standard areas. All areas were then determined using SigmaScan 3.5 relative to the standard curve for each photograph (See Methods). The average and lowest  $R^2$  for a standard curves were 0.998 and 0.987, respectively.
